# Supplementary material for: The metabolic signaling of the nucleoredoxin-like 2 gene supports brain function
Source: PubMed Central journal article supplement — Redox Biol. 2021 Nov 25;48:102198. doi: 10.1016/j.redox.2021.102198 (PMC8640531; doi:10.1016/j.redox.2021.102198), 2021-11-25

A

| Study ID | Metabolite                                       | AAV-GFP                                          |                                                  | ½ AAV-RdCVF2                                     | Metabolic pathway                       |
|----------|--------------------------------------------------|--------------------------------------------------|--------------------------------------------------|--------------------------------------------------|-----------------------------------------|
|          |                                                  | <i>Nxn12</i> <sup>+/+</sup><br>(n = 7)<br>3♀, 4♂ | <i>Nxn12</i> <sup>-/-</sup><br>(n = 6)<br>3♀, 3♂ | <i>Nxn12</i> <sup>-/-</sup><br>(n = 6)<br>3♀, 3♂ |                                         |
| 1        | UDP-Glucose (μmol / l)                           | 1.41 +/-0.42                                     | 1.49 +/-0.02                                     | 1.44 +/- 0.04                                    | Glycogen synthesis                      |
| 2        | Glucose-1-phosphate (μmol / l)                   | 1.30 +/- 0.12                                    | 1.23 +/-0.07                                     | 1.25 +/-0.08                                     | Glycogenolysis                          |
| 3        | Glucose-6-phosphate (μmol / l)                   | 0.12 +/-0.03                                     | 0.26 +/-0.02                                     | 0.42 +/-0.13                                     | Glycolysis                              |
| 4        | Fructose-6-phosphate (F6P) (μmol / l)            | 0.07 +/-0.01                                     | 0.15 +/-0.01                                     | 0.20 +/-0.04                                     | Glycolysis                              |
| 5        | Mannose-6-phosphate (μmol / l)                   | 0.11 +/- 0.01                                    | 0.16 +/-0.01                                     | 0.18 +/-0.04                                     | Hexosamine pathway (branching on F6P)   |
| 6        | UDP-N-acetyl-glucosamine (μmol / l)              | 1.52 +/-0.03                                     | 1.61 +/-0.02                                     | 1.61 +/-0.06                                     | Hexosamine pathway                      |
| 7        | GDP-mannose (μmol / l)                           | 0.40 +/-0.02                                     | 0.32 +/-0.02                                     | 0.27 +/-0.01                                     | Hexosamine pathway                      |
| 8        | Fructose-1,6-biphosphate (μmol / l)              | 0.96 +/-0.17                                     | 2.98 +/-0.29                                     | 3.40 +/-1.01                                     | Glycolysis                              |
| 9        | Glycerol-3-phosphate (C12/C13) <sup>3</sup>      | 85.93 +/- 5.33                                   | 124.43 +/-10.81                                  | 95.90 +/-15.77                                   | Kennedy path. (branching on glycolysis) |
| 10       | 2/3-Phosphoglycerate (2/3-PG) (μmol / l)         | 0.46 +/-0.04                                     | 0.64 +/-0.06                                     | 0.90 +/-0.17                                     | Glycolysis                              |
| 11       | Phospho-serine                                   | ND <sup>1</sup>                                  | ND <sup>1</sup>                                  | ND <sup>1</sup>                                  | Serine synthesis (branching on 3-PG)    |
| 12       | Phosphoenolpyruvate (μmol / l)                   | 2.20 +/-0.17                                     | 2.69 +/-0.17                                     | 2.94 +/-0.31                                     | Glycolysis                              |
| 13       | Citrate (C12/C13) <sup>3</sup>                   | 6.68 +/-0.55                                     | 6.67 +/-0.13                                     | 7.26 +/-0.39                                     | Tricarboxylic acid cycle                |
| 14       | cis-Aconitate (μmol / l)                         | 0.13 +/-0.02                                     | 0.06 +/- 0.00                                    | 0.09 +/-0.02                                     | Tricarboxylic acid cycle                |
| 15       | α-Ketoglutarate (C12/C13) <sup>3</sup>           | 0.97 +/-0.05                                     | 0.87 +/-0.04                                     | 0.93 +/-0.03                                     | Tricarboxylic acid cycle                |
| 16       | 2-Hydroxyglutarate (μmol / l)                    | ND <sup>1</sup>                                  | ND <sup>1</sup>                                  | ND <sup>1</sup>                                  | Branching from α-Ketoglutarate          |
| 17       | Succinate (C12/C13) <sup>3</sup>                 | 2.27 +/-0.12                                     | 2.50 +/-0.12                                     | 2.24 +/-0.14                                     | Tricarboxylic acid cycle                |
| 18       | Fumarate (C12/C13) <sup>3</sup>                  | 3.51 +/-0.23                                     | 3.77 +/-0.24                                     | 3.74 +/-0.12                                     | Tricarboxylic acid cycle                |
| 19       | Malate (C12/C13) <sup>3</sup>                    | 6.13 +/-0.23                                     | 5.96 +/-0.16                                     | 6.00 +/-0.12                                     | Tricarboxylic acid cycle                |
| 20       | 6-Phosphogluconate (μmol / l)                    | 0.19 +/-0.02                                     | 0.19 +/-0.02                                     | 0.37 +/-0.06                                     | Pentose phosphate pathway               |
| 21       | Ribose-1-phosphate (μmol / l)                    | 1.27 +/-0.06                                     | 1.03 +/-0.04                                     | 1.12 +/-0.09                                     | Pentose phosphate pathway               |
| 22       | Ribose-5-P + Ribulose-5-P (μmol / l)             | ND <sup>1</sup>                                  | ND <sup>1</sup>                                  | ND <sup>1</sup>                                  | Pentose phosphate pathway               |
| 23       | Rib-5P (μmol / l)                                | ND <sup>1</sup>                                  | ND <sup>1</sup>                                  | ND <sup>1</sup>                                  | Pentose phosphate pathway               |
| 24       | Ribulose-5P (μmol / l)                           | ND <sup>1</sup>                                  | ND <sup>1</sup>                                  | ND <sup>1</sup>                                  | Pentose phosphate pathway               |
| 25       | Phosphoribosyl diphosphate (μmol / l)            | <b>12.80 +/-2.15</b>                             | <b>8.25 +/-0.91</b>                              | <b>7.02 +/-0.72</b>                              | Pentose phosphate pathway               |
| 26       | Sedoheptulose-7-phosphate (C12/C13) <sup>3</sup> | 1.29 +/-0.16                                     | 1.50 +/-0.12                                     | 1.90 +/-0.27                                     | Pentose phosphate pathway               |
| 27       | AMP (μmol / l)                                   | 1.24 +/-0.10                                     | 1.24 +/-0.03                                     | 2.07 +/-0.82                                     | Nucleotides synthesis                   |
| 28       | ADP (C12/C13) <sup>3</sup>                       | 14.10 +/-1.57                                    | 18.32 +/-0.74                                    | 15.99 +/-1.80                                    | Nucleotides synthesis                   |
| 29       | ATP (C12/C13) <sup>3</sup>                       | 20.81 +/-2.82                                    | 31.30 +/-1.96                                    | 24.33 +/-5.24                                    | Nucleotides synthesis and OXPHO         |
| 30       | CMP (μmol / l)                                   | 0.38 +/-0.03                                     | 0.38 +/-0.02                                     | 0.38 +/-0.04                                     | Nucleotides synthesis                   |
| 31       | CDP (μmol / l)                                   | 0.08 +/-0.00                                     | 0.10 +/-0.01                                     | 0.10 +/-0.01                                     | Nucleotides synthesis                   |
| 32       | CTP (μmol / l)                                   | LOQ <sup>2</sup>                                 | LOQ <sup>2</sup>                                 | LOQ <sup>2</sup>                                 | Nucleotides synthesis                   |
| 33       | GMP (μmol / l)                                   | 2.37 +/-0.16                                     | 1.90 +/-0.43                                     | 1.88 +/-0.32                                     | Nucleotides synthesis                   |
| 34       | cGMP (μmol / l)                                  | LOQ <sup>2</sup>                                 | LOQ <sup>2</sup>                                 | LOQ <sup>2</sup>                                 | Nucleotides synthesis                   |
| 35       | GDP (μmol / l)                                   | 3.27 +/-0.13                                     | 3.37 +/-0.19                                     | 3.17 +/-0.30                                     | Nucleotides synthesis                   |
| 36       | Orotate (μmol / l)                               | 0.04 +/-0.00                                     | 0.04 +/-0.00                                     | 0.04 +/-0.00                                     | Nucleotides synthesis                   |
| 37       | UMP (μmol / l)                                   | 1.01 +/-0.04                                     | 1.04 +/-0.01                                     | 1.05 +/-0.04                                     | Nucleotides synthesis                   |
| 38       | UDP (μmol / l)                                   | 0.10 +/-0.01                                     | 0.14 +/-0.02                                     | 0.14 +/-0.03                                     | Nucleotides synthesis                   |
| 39       | UTP (μmol / l)                                   | 0.20 +/-0.01                                     | 0.22 +/-0.01                                     | 0.23 +/-0.02                                     | Nucleotides synthesis                   |

<sup>1</sup> Not detected, <sup>2</sup> Limit of quantification, <sup>3</sup> Cannot be directly compared to figure S4A because of difference in the internal standard

B

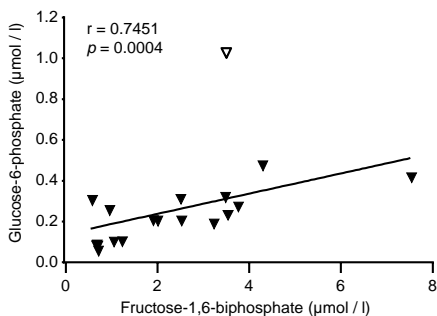

C Glucose-1-phosphate

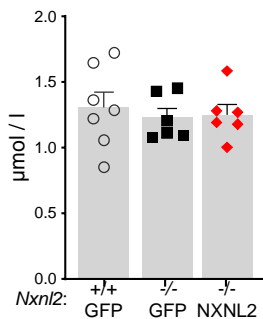

D UDP-N-acetyl glucosamine

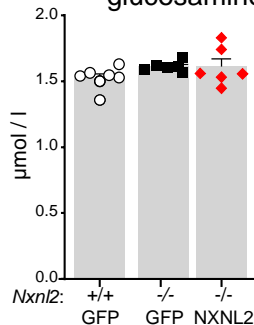

E Phosphoribosyl pyrophosphate

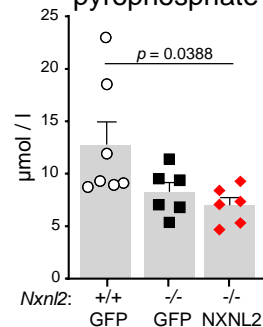

Supplement: mmc7.pdf [file mmc7.pdf]
