# Supplementary figures and images for: The metabolic signaling of the nucleoredoxin-like 2 gene supports brain function
Source: PubMed Central journal article supplement — Redox Biol. 2021 Nov 25;48:102198. doi: 10.1016/j.redox.2021.102198 (PMC8640531; doi:10.1016/j.redox.2021.102198), 2021-11-25

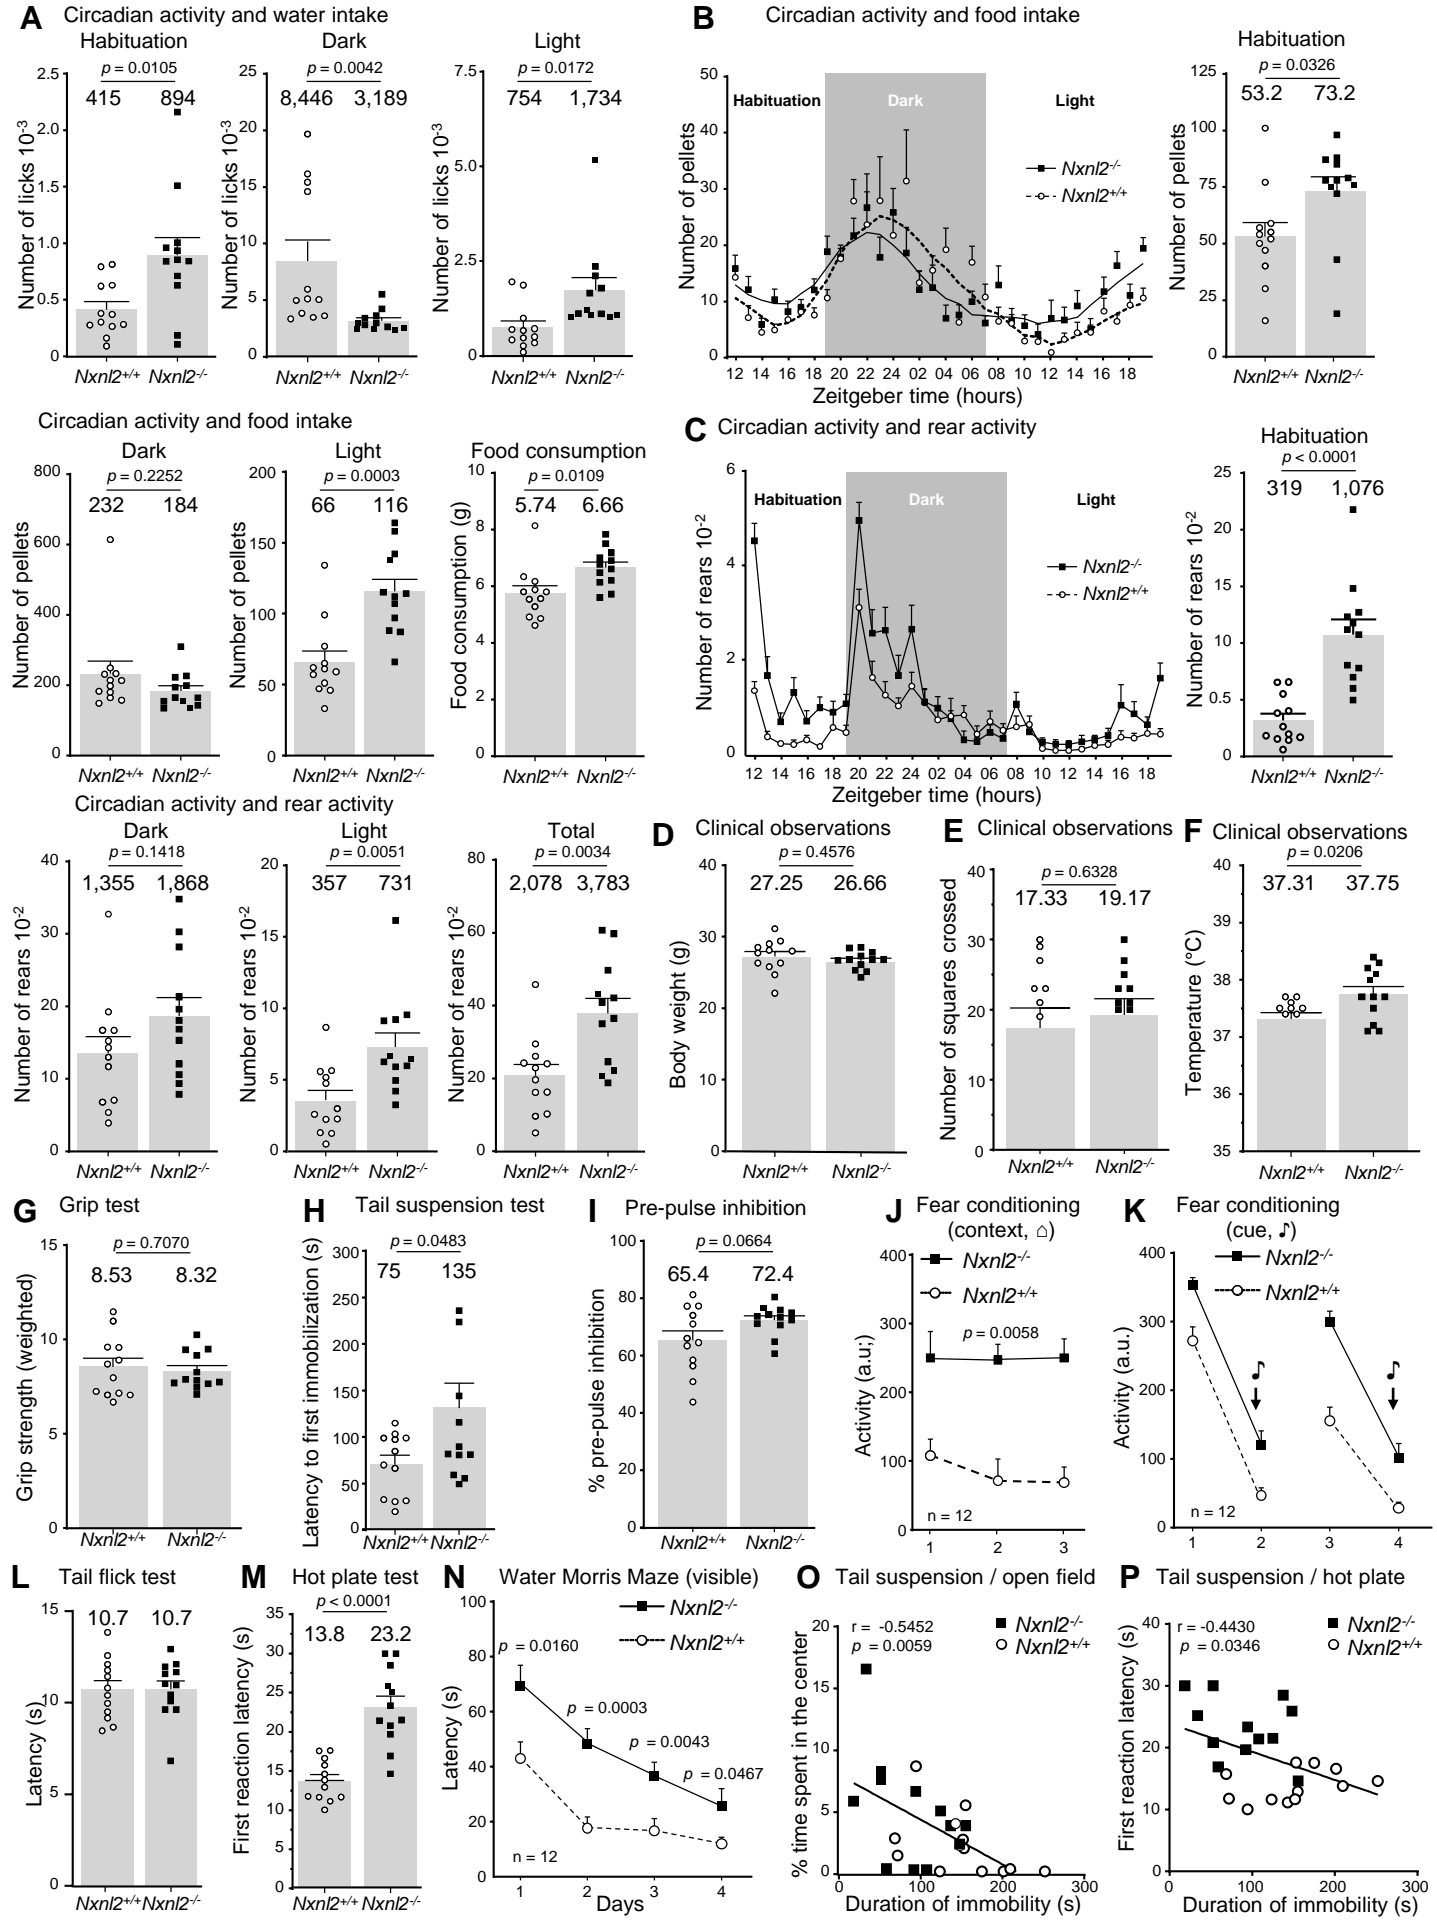

Supplement: mmc2.pdf [file mmc2.pdf]

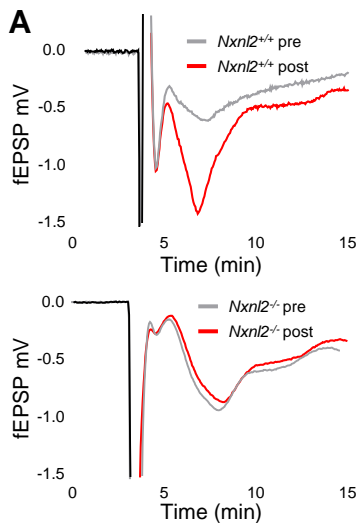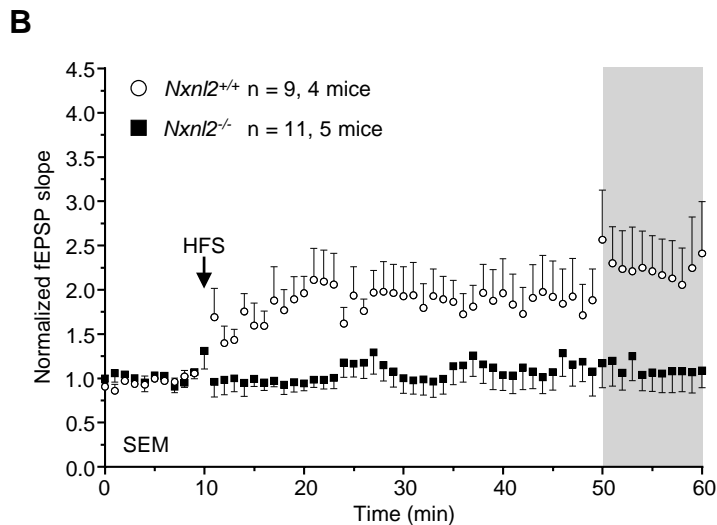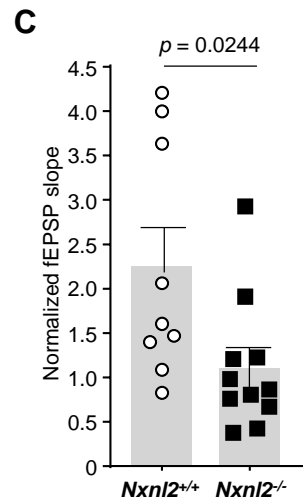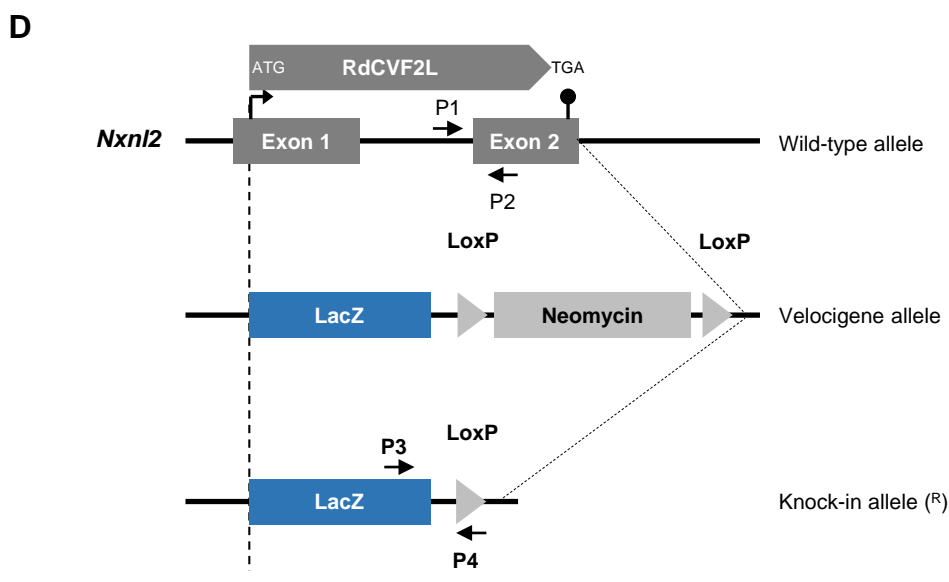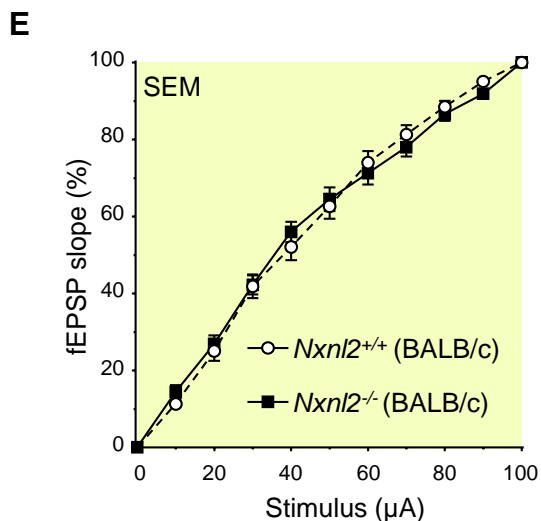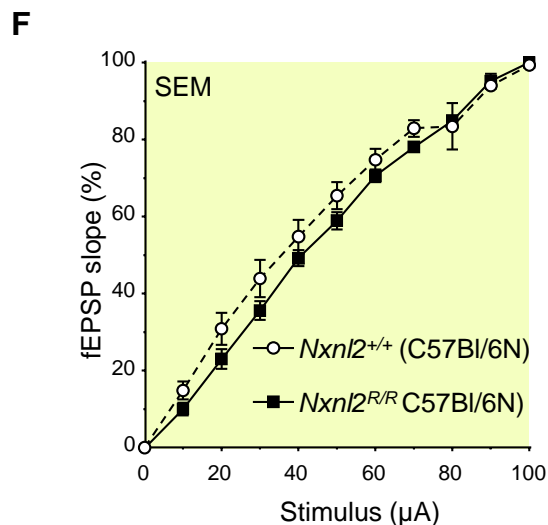

Supplement: mmc3.pdf [file mmc3.pdf]

**A** Olfactory tube

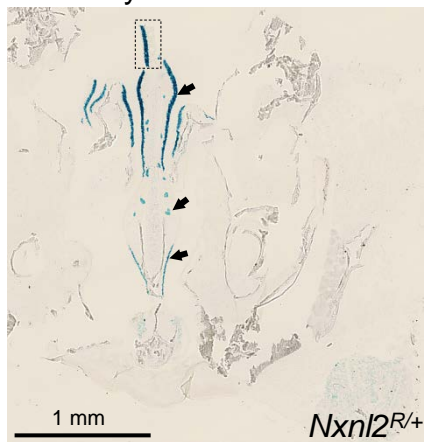

**B**

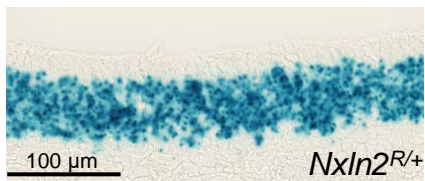

**C**

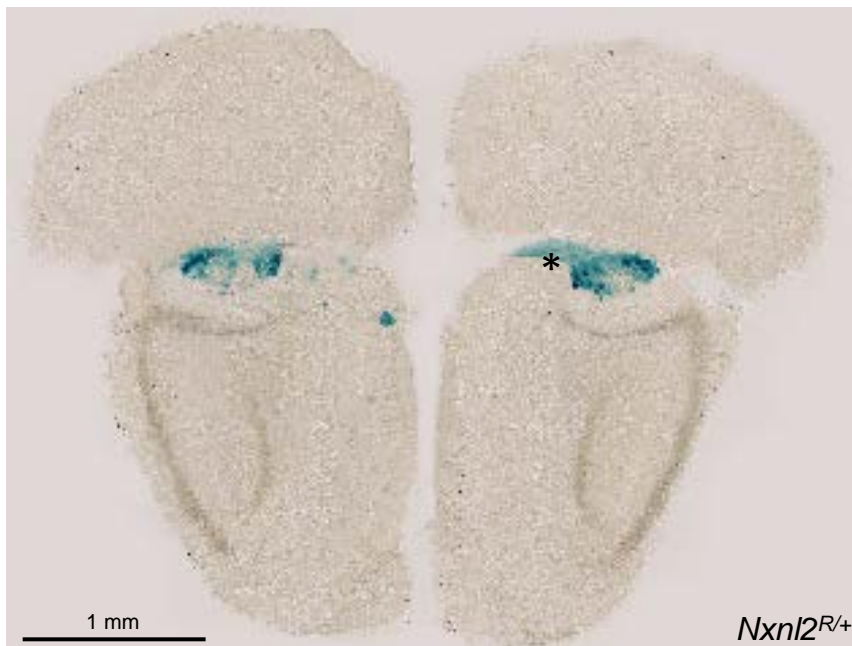

**D** *area postrema*

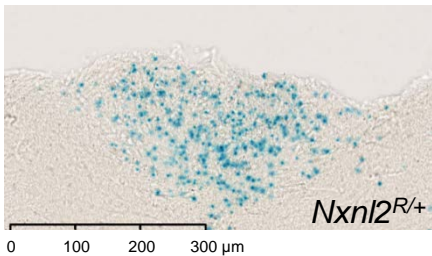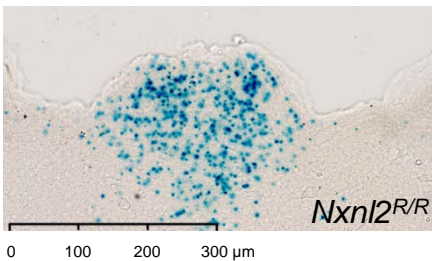

**E** Subfornical organ

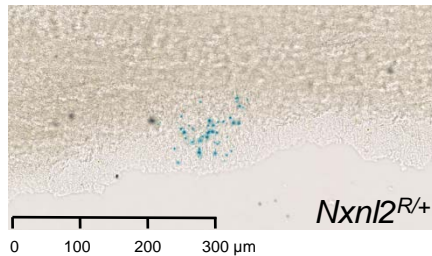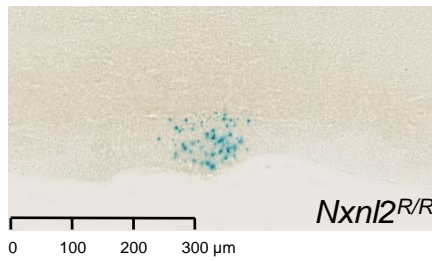

**F** Median preoptic nucleus

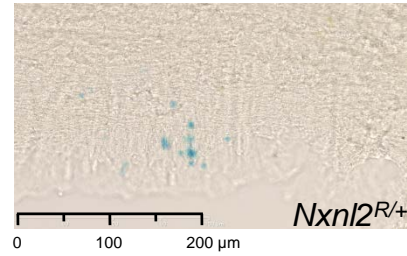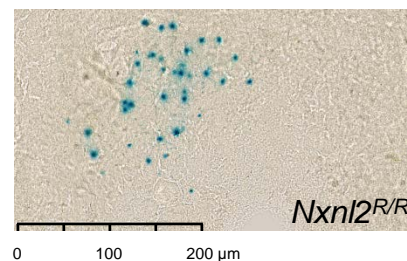

Supplement: mmc4.pdf [file mmc4.pdf]

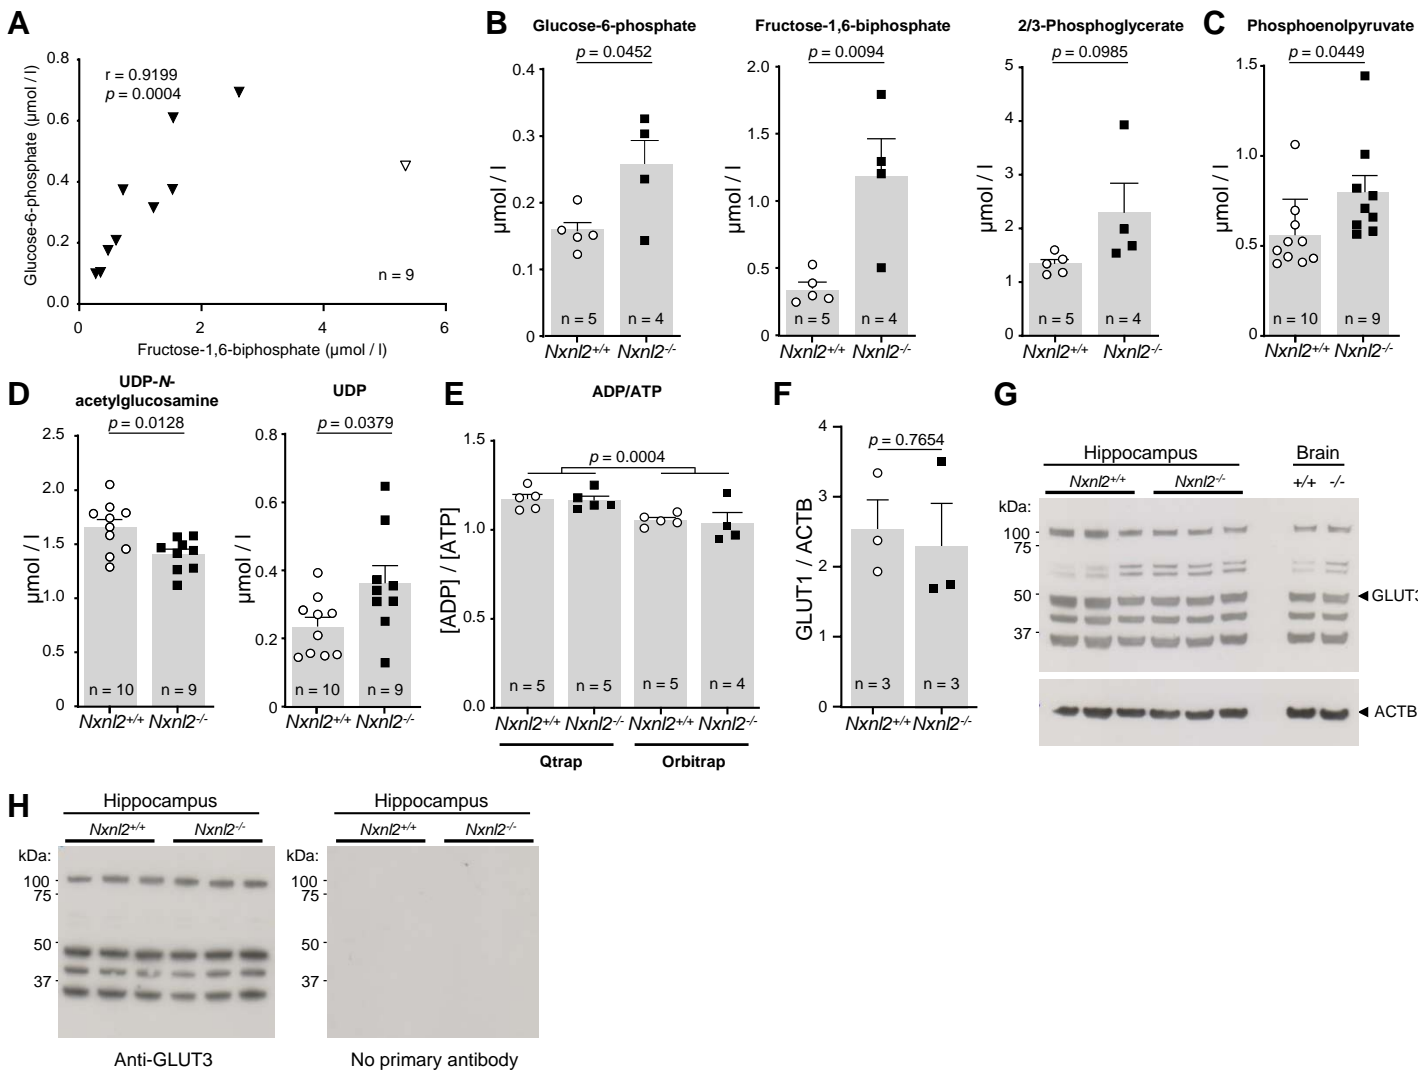

Supplement: mmc5.pdf [file mmc5.pdf]

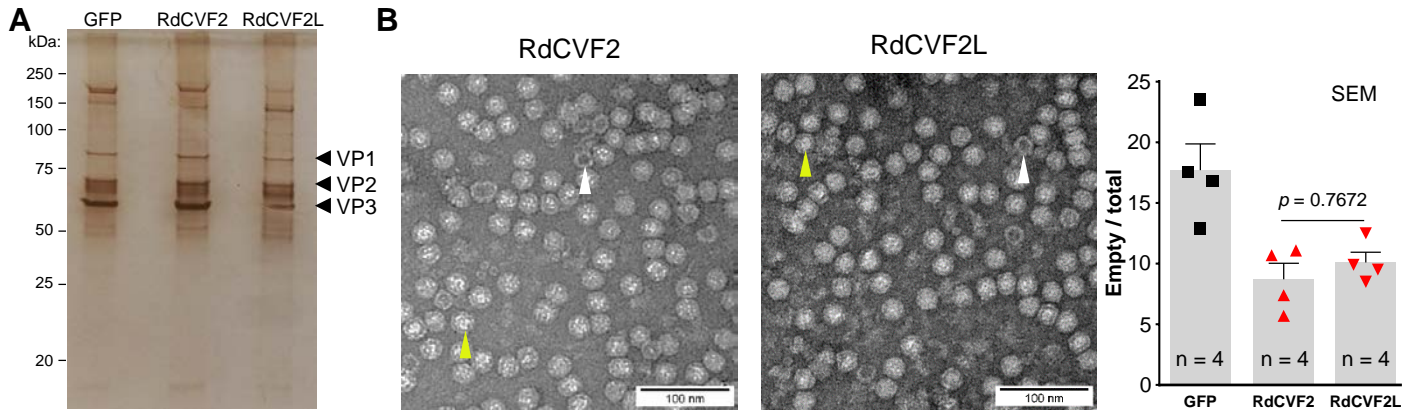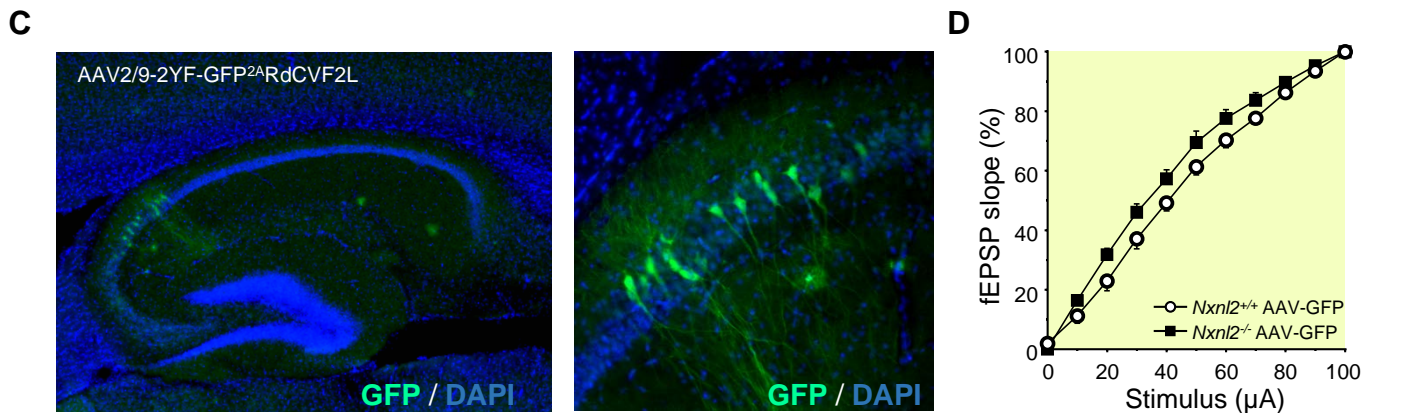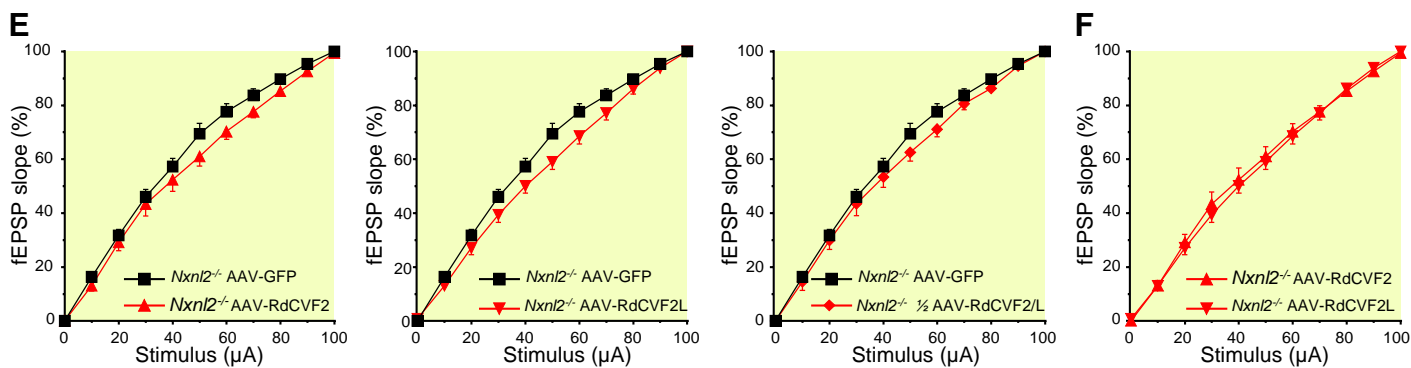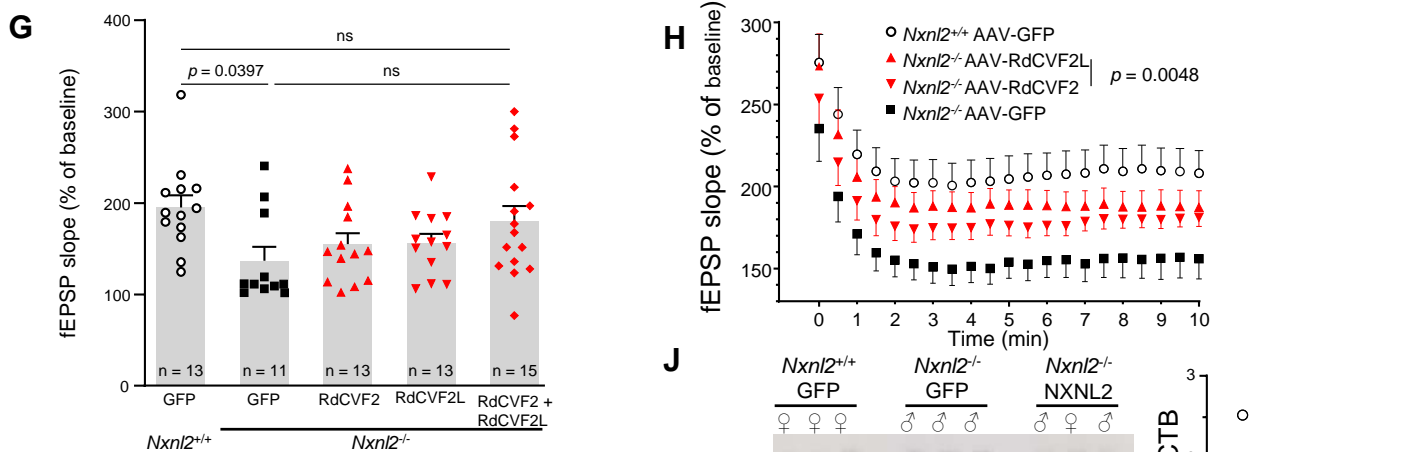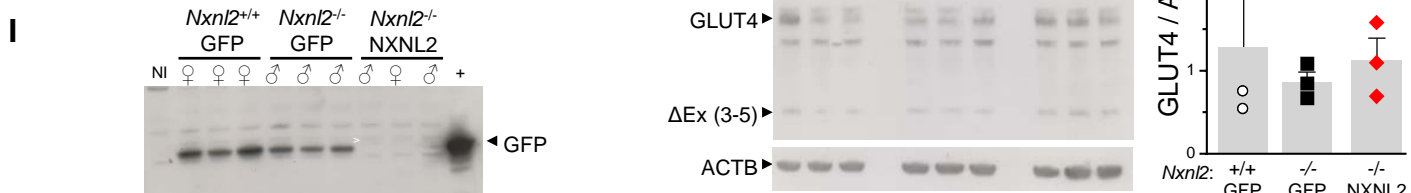

Supplement: mmc6.pdf [file mmc6.pdf]

**A**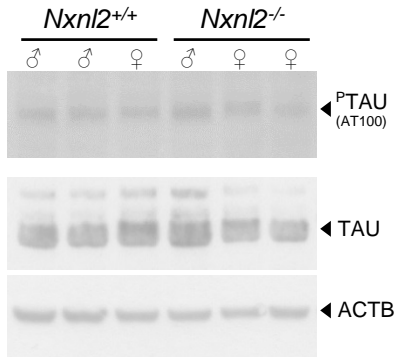**B**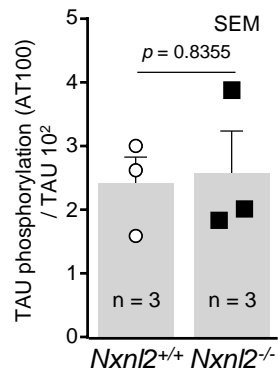**C**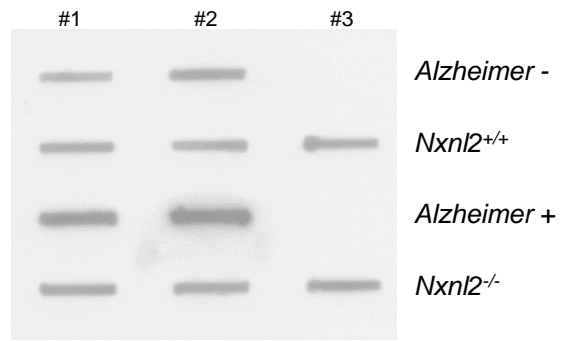**D**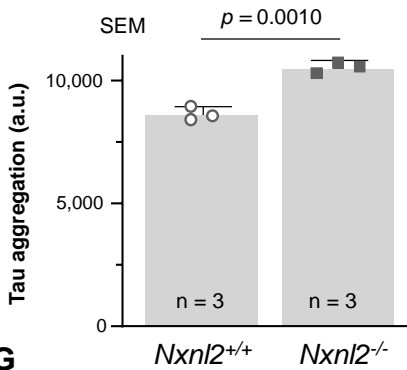**E**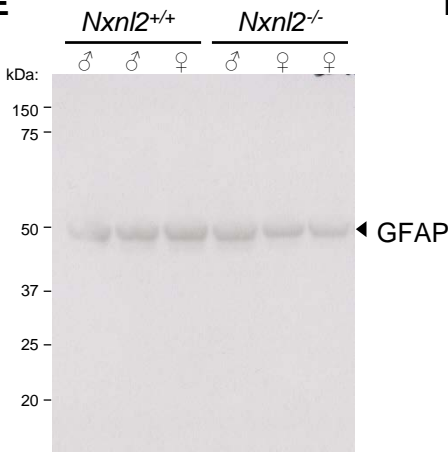**F**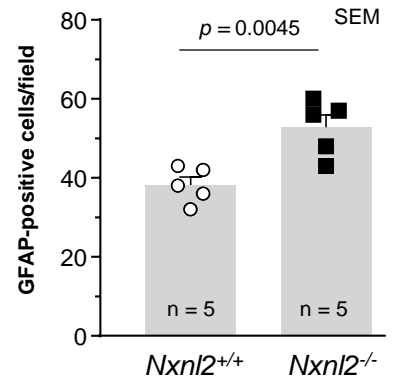**G**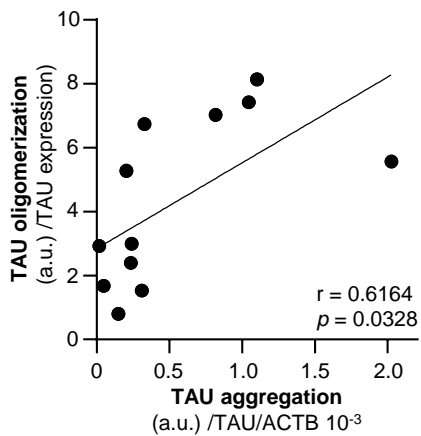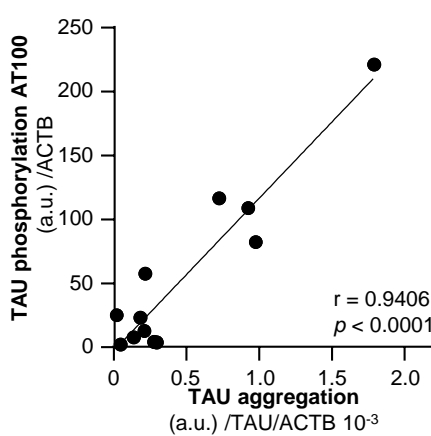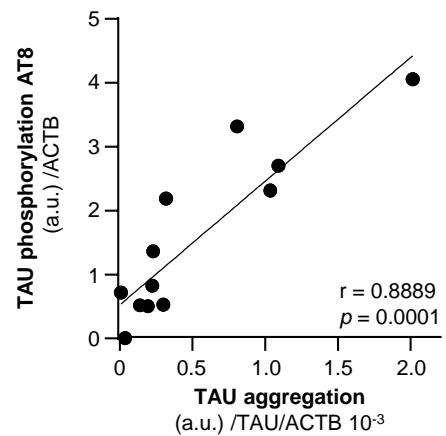

Supplement: mmc8.pdf [file mmc8.pdf]
